# Supplementary material
Source: publisher figshare collection journal article supplement (https://karger.figshare.com/ndownloader/files/26615660)
Supplement: Supplementary file 1 [file 26615660]

**Supplementary Material**

**Title:** Comparison of Approaches for Prediction of Renal Replacement Therapy-Free Survival in Patients with Acute Kidney Injury

**Tables:**

**Table S1.** List of International Classification of Diseases, Ninth revision diagnostic (ICD-9) codes to identify patients with acute kidney injury (AKI) and end-stage renal disease (ESRD)

**Table S2.** The clinical features for predicting renal replacement therapy-free survival (RRTFS).

**Figures:**

**Figure S1.** Examples of renal replacement therapy-free survival (RRTFS).

**Figure S2.** The flow chart of the patients in the study.
